# Supplementary material for: RGO/TiO2 nanosheets immobilized on magnetically actuated artificial cilia film: a new mode for efficient photocatalytic reaction
Source: Royal Society of Chemistry journal article supplement (doi:10.1039/c6ra26306b), 2017-01-01
Supplement: c6ra26306b1.pdf [file c6ra26306b1.pdf]

## Electronic Supplementary Information

### **RGO/TiO<sub>2</sub> nanosheets immobilized on magnetically actuated artificial cilia film: A new mode for efficient photocatalytic reaction**

Wei Wang<sup>a,b\*</sup>, Xiaogu Huang<sup>a,b</sup>, Min Lai<sup>a</sup>, Chunhua Lu<sup>b,c\*</sup>

<sup>a</sup>School of Physics and Optoelectronic Engineering, Nanjing University of Information Science & Technology, Nanjing 210044, PR China

<sup>b</sup>Jiangsu Collaborative Innovation Center for Advanced Inorganic Function Composites, Nanjing Tech University, Nanjing 210009, PR China

<sup>c</sup>State Key Laboratory of Materials-Oriented Chemical Engineering, College of Materials Science and Engineering, Nanjing Tech University, Nanjing 210009, PR China

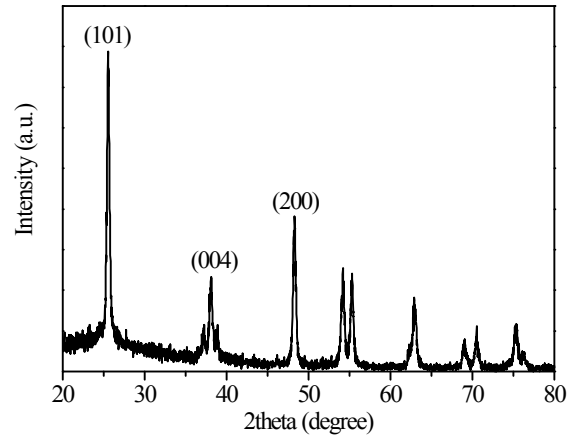

**Fig. S1** XRD pattern of as-prepared TiO<sub>2</sub> nanosheets.

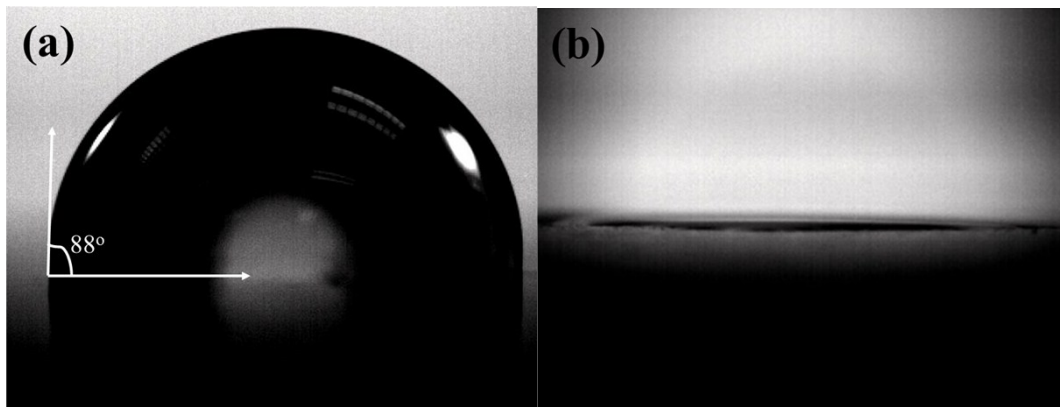

**Fig. S2** Photograph of water droplets deposited on the PDMS film (a) before and (b) after AAPGD treatment.

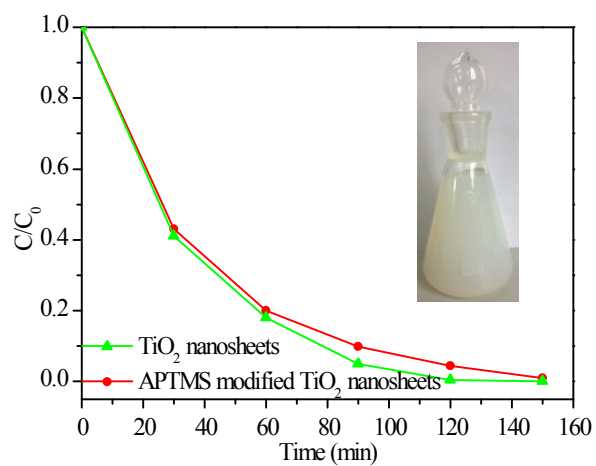

**Fig. S3** Photocatalytic activity of pristine and APTMS modified  $TiO_2$  nanosheets in decomposing RhB. Photograph of APTMS modified  $TiO_2$  nanosheets dispersed in ethanol is inserted.

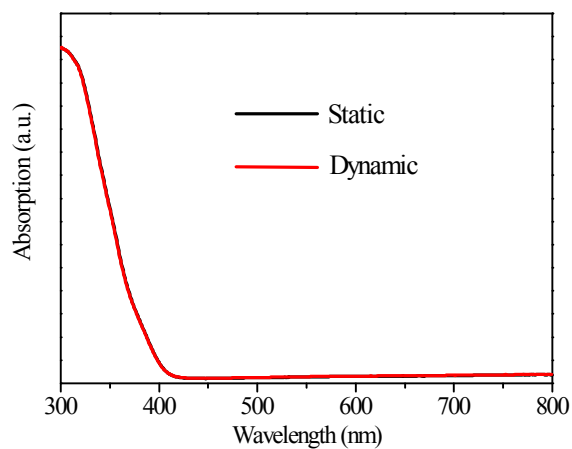

**Fig. S4** Light absorption spectra of the cilia film immobilized RGO/ $TiO_2$  at the static state and dynamic state (800 r/min).

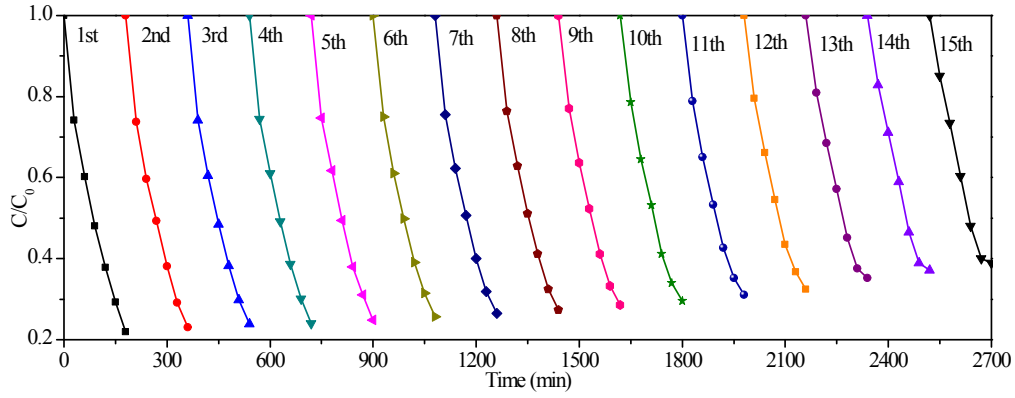

**Fig. S5** Circular reactions of as-prepared artificial cilia film in decomposing RhB at a magnetic actuation speed of 800r/min.

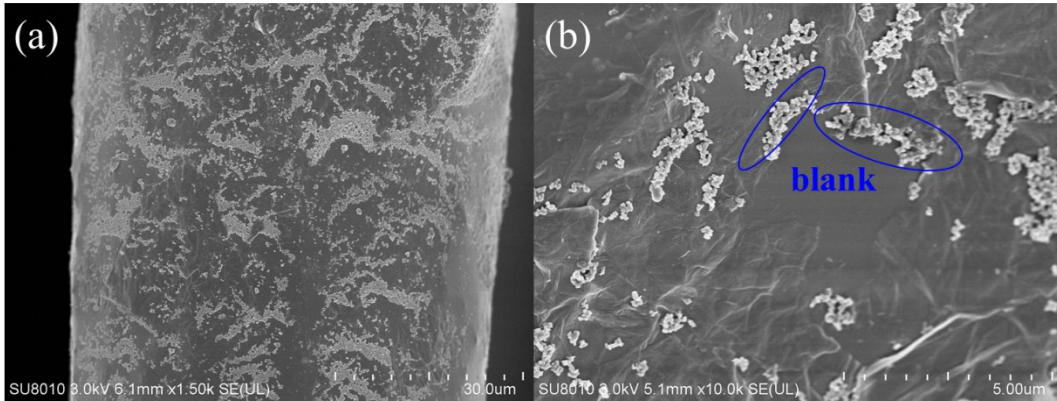

**Fig. S6** SEM images of (a) typical cilia surface and (b) the reduced  $\text{TiO}_2$  density and positive effect of RGO after 15 circular reactions.

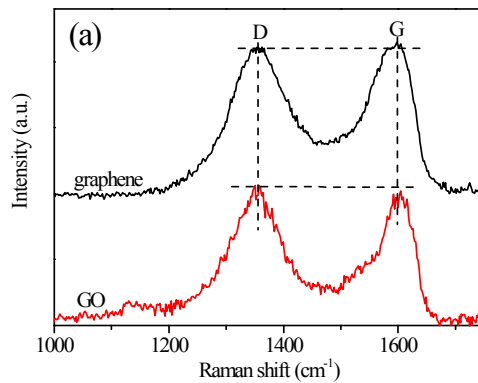

**Fig. S7** Raman spectra of GO and RGO.
